# Comparative Genome Analysis and Phylogenetic Relationship of Order Liliales Insight from the Complete Plastid Genome Sequences of Two Lilies (*Lilium longiflorum* and *Alstroemeria aurea*)

Jung Sung Kim, Joo-Hwan Kim\*

Department of Life Science, Gacheon University, Seongnam, Gyeonggi-do, South Korea

## Abstract

Monocots are one of the most diverse, successful and economically important clades of angiosperms. We attempt to analyse the complete plastid genome sequences of two lilies and their lengths were 152,793bp in *Lilium longiflorum* (Liliaceae) and 155,510bp in *Alstroemeria aurea* (Alstroemeriaceae). Phylogenetic analyses were performed for 28 taxa including major lineages of monocots using the sequences of 79 plastid genes for clarifying the phylogenetic relationship of the order Liliales. The sister relationship of Liliales and Asparagales-commelinids was improved with high resolution. Comparative analyses of inter-familial and inter-specific sequence variation were also carried out among three families of Liliaceae, Smilacaceae, and Alstroemeriaceae, and between two *Lilium* species of *L. longiflorum* and *L. superbum*. Gene content and order were conserved in the order Liliales except *infA* loss in *Smilax* and *Alstroemeria*. IR boundaries were similar in IRa, however, IRb showed different extension patterns as JLB of *Smilax* and JSB in *Alstroemeria*. Ka/Ks ratio was high in *matK* among the pair-wise comparison of three families and the most variable genes were *psaJ*, *ycf1*, *rpl32*, *rpl22*, *matK*, and *ccsA* among the three families and *rps15*, *rpoA*, *matK*, and *ndhF* between *Lilium*.

**Citation:** Kim JS, Kim J-H (2013) Comparative Genome Analysis and Phylogenetic Relationship of Order Liliales Insight from the Complete Plastid Genome Sequences of Two Lilies (*Lilium longiflorum* and *Alstroemeria aurea*). PLoS ONE 8(6): e68180. doi:10.1371/journal.pone.0068180

**Editor:** Marc Robinson-Rechavi, University of Lausanne, Switzerland

**Received:** February 18, 2013; **Accepted:** May 27, 2013; **Published:** June 18, 2013

**Copyright:** © 2013 Kim et al. This is an open-access article distributed under the terms of the Creative Commons Attribution License, which permits unrestricted use, distribution, and reproduction in any medium, provided the original author and source are credited.

**Funding:** This work was funded by the Korean Science and Engineering Foundation (KOSEF, 2010-0029131). The funders had no role in study design, data collection and analysis, decision to publish, or preparation of the manuscript.

**Competing interests:** The authors have declared that no competing interests exist.

\* E-mail: kimjh2009@gachon.ac.kr

## Introduction

The plastid genome generally contains 30–50 different RNA genes and about 100 protein-coding genes in land plants, which are roughly classified into two main groups: genes involved in the expression and translation machinery of the chloroplast, and genes related to bioenergetics and photosynthetic function [1]. It is highly conserved in organization, gene order and content with a typical circular form [2]. In the past several years, numerous data for genomic sequences have been pouring in and are being applied in the plant phylogeny field due to the development and advancement of next-generation sequencing (NGS) technologies. This method has contributed to improve many studies in plant biology: molecular marker development, hybridisation and introgression, transcriptome investigation, phylogenetic and ecological studies and polyploidy genetics [3].

Among the monocots, sequence data for the plastid genome have been rapidly accumulating for the Poaceae members in

particular, focusing on the economically important plant species [4–14] since *Oryza sativa* was first analyzed [15]. This moved the interest to non-model plants and gave rise to an expansion of the database for monocot plastid genome sequences [12,14,16–21], giving us the opportunity to resolve their phylogenetic relationships. Jansen and colleagues [22] examined the phylogenetic relationships of angiosperms using 81 genes and reported specific gene and intron losses in the main lineage of monocots, including *accD* in *Acorus* (Acorales), *rps16* in *Dioscorea* (Dioscoreales), the *ndh* gene cluster in *Phalaenopsis* (Asparagales), *rpl32* in *Yucca* (Asparagales) and *accD*, the *clpP* intron, the *rpoC1* intron and *ycf1* and *ycf2* in Poales.

Monocots are one of the major radiations of angiosperms. They have relatively uniform characters: a single cotyledon, parallel leaf venation, floral parts in threes, sieve-tube plastids with several cuneate protein crystals, scattered vascular bundles in their stems, no vascular cambium-producing secondary phloem and secondary xylem with some exceptions

[23]. They comprise *ca* 61,000 species in 78–80 families and 11 orders [24,25] and are one of the most diverse, morphologically varied, ecologically successful and economically important clades of angiosperms [12].

Although many molecular phylogenetic studies have led to a remarkable reclassification and understanding of relationships within and among the orders, many relationships remain weakly supported among the orders and families. In contrast to the morphological data, molecular data placed *Acorus* on the root node within monocots [26,27]. This was also revealed by recent plastome sequence analyses [12,22,28]. Chase and colleagues [26] suggested a well-defined ordinal relationship in monocots using combined data from seven genes: four plastid genes, one mitochondrial gene and two nuclear ribosomal genes. Twelve orders were positioned subsequently from the root: Acorales, Alismatales, Petrosaviales, Dioscoreales and Pandanales, Liliales, Asparagales and commelinids, which includes the five orders of Arecales, Commelinales, Zingiberales, Dasygogonales and Poales. Although all orders were strongly supported, the sister relationship between Liliales and Asparagales remains uncertain as does the ordinal relationship within commelinids. Givnish and colleagues [12] tried to resolve these uncertain relationships using 81 plastome-encoded gene sequences and an increase in taxon sampling, including 32 families of monocots, and the results showed an improved support value for those relationships in the maximum likelihood (ML) tree. However, their positions and relationships are still ambiguous, and in addition, the position of Liliales and Dioscoreales+Pandanales is reversed in the most parsimonious (MP) tree. These problematic relationships were also described in the phylogenetic study of Moore and colleagues [28] using plastid inverted repeat sequences. Recently Liu and colleagues [29] reported a complete plastid genome of *Smilax china* (Smilacaceae), a member of Liliales, and tried to analyse the phylogenetic relationship of monocots using three different combined data matrix of 63 chloroplast genes (excluding *ndhA-K*, *infA*, *rps16*, and *ycf2* from 77 genes data matrix), 77 protein coding genes, and 81 genes (including rRNA genes from 77 genes data matrix) focused on the position of Liliales. It showed a sister relationship of Liliales and Dioscoreales-Pandanales that was strongly supported by 63 genes, while a sister relationship of Liliales with the commelinids-Asparagales clade was supported moderately on ML analysis by the 81 genes. They suggested a rapid divergence among Liliales, Dioscoreales-Pandanales, and commelinids-Asparagales.

We analyzed the complete plastid genomes of two lilies from different families, the Easter lily (*Lilium longiflorum*, Liliaceae) and Peruvian lily (*Alstroemeria aurea*, Alstroemeriaceae), which are famous ornamental flowers in the order Liliales. The former is recognized as most distinctive genera being closer to Smilacaceae and the latter is near to the basal clade in the order Liliales [30]. Although they have not generated the complete sequence and structure, the partial protein coding gene sequences of *Lilium superbum* was repeatedly referred as a representative of Liliales in many studies. We also attempted to compare the organisation of the whole plastid genome among 3 families of Liliales and to clarify the

phylogenetic position of the order Liliales within monocots using 79 protein-coding gene sequences. In addition, we confirmed the sequence variation in species level of the order Liliales using the 78 plastid genes of two *Lilium* species, newly analyzed *L. longiflorum* and *L. superbum* downloaded from the NCBI database. We also described here a new method for extracting plastid DNA with a simple buffer composition compared to previously applied methodologies [31–33], in the hope that it will be applied in monocot plastome research without the centrifuge equipped swinging bucket rotor.

## Materials and Methods

### Plastid isolation from two lilies

We established a simple method for isolating plastids of *Lilium longiflorum* and it was successfully applied to *Alstroemeria aurea*. We prepared 50 g of fresh young leaves and deposited in a refrigerator for 2 days. They were then cut in 1–2-cm<sup>2</sup> pieces and blended with isolation buffer [CIB; 0.35 M sorbitol, 50 mM Tris-HCl, 5 mM EDTA, 0.1% bovine serum albumin (BSA; w/v, Sigma A4503), 0.01% DL-DTT]. The slush was filtered through a 4-fold gauze by squeezing and a 3-fold miracloth (Calbiochem, cat. no. 475855) without squeezing. The filtrate was centrifuged at 200 *g* for 3 min and the supernatant was centrifuged again at 1,000 *g* for 7 min. After the pellet was completely diluted with CIB buffer without BSA, the plastid band was extracted using a 40/80% Percoll gradient by centrifuging at 3,200 *g* for 15 min. To purify the plastid solution, 3 volumes of CIB buffer without BSA, were added to the isolated solution and centrifuged at 1,700 *g* for 1 min. The pellet was dissolved again with CIB buffer without BSA, and plastid DNA was used as a template for 454 pyrosequencing and finally extracted using a DNeasy Plant Mini Kit (Qiagen, cat. no. 69104). Until the plastid DNA was isolated, the high-speed centrifuge was maintained at 4°C.

### Genome sequencing, assembling and annotation

The genome sequencing was performed at SolGent Co. (Daejeon, Korea). The quality of the DNA was assessed by gel electrophoresis (Fig. S1) and the quantity was estimated by a fluorescence-based method using the Quant-iT PicoGreen dsDNA Kit (Invitrogen). A whole-genome shotgun library was generated from 5 µg of the plastid DNA with the GS DNA Library Preparation Kit (Roche Applied Science) according to the manufacturer's protocol. The DNA library was titrated by means of sequencing on the Genome Sequencer FLX system (Roche Applied Science). Based on the results of the titration sequencing run, an appropriate amount of the DNA library was used for the emulsion PCR setup. Subsequently, the clonally amplified DNA fragments bound to capture beads were enriched and sequenced on four medium regions of a PicoTiter Plate using standard sequencing chemistry (Roche Applied Science). Upon sequencing and processing of the raw data, a de novo assembly was performed using the GS de novo Assembler software version 2.5.3 with default settings. Gaps between the contigs were filled using designed primer sets and whole plastid genome sequence was obtained. The plastid genome of *Lilium longiflorum* and *Alstroemeria aurea* were

**Table 1.** List of taxa used for the phylogenetic analysis of major lineage of monocots.

| Ref. no.              | Species                                               | Family           | Order          | Length  |
|-----------------------|-------------------------------------------------------|------------------|----------------|---------|
| NC010093              | <i>Acorus americanus</i>                              | Acoraceae        | Acorales       | 153,819 |
| NC007407              | <i>Acorus calamus</i>                                 | Acoraceae        | Acorales       | 153,821 |
| NC010109              | <i>Lemna minor</i>                                    | Araceae          | Alismatales    | 165,955 |
| NC009601              | <i>Dioscorea elephantipes</i>                         | Dioscoreaceae    | Dioscoreales   | 152,609 |
| HQ180687-<br>HQ183091 | <i>Pandanus utilis</i>                                | Pandanaceae      | Pandanales     | unknown |
| NC014056              | <i>Oncidium Gower</i>                                 | Orchidaceae      | Asparagales    | 146,484 |
| NC007499              | <i>Phalaenopsis aphrodite</i> subsp. <i>formosana</i> | Orchidaceae      | Asparagales    | 148,964 |
| DQ069347-<br>DQ069702 | <i>Yucca schidigera</i>                               | Asparagaceae     | Asparagales    | unknown |
| HM536959              | <i>Smilax china</i>                                   | Smilacaceae      | Liliales       | 157,878 |
| HQ180423-<br>HQ183692 | <i>Lilium superbum</i>                                | Liliaceae        | Liliales       | unknown |
| This study            | <i>Lilium longiflorum</i>                             | Liliaceae        | Liliales       | 152,789 |
| This study            | <i>Alstroemeria aurea</i>                             | Alstroemeriaceae | Liliales       | 155,506 |
| NC013991              | <i>Phoenix dactylifera</i>                            | Arecaceae        | Arecales       | 158,462 |
| NC015830              | <i>Bambusa emeiensis</i>                              | Poaceae          | Poales         | 139,493 |
| NC015831              | <i>Ferocalamus rimosivaginus</i>                      | Poaceae          | Poales         | 139,467 |
| NC011713              | <i>Festuca arundinacea</i>                            | Poaceae          | Poales         | 136,048 |
| NC009950              | <i>Lolium perenne</i>                                 | Poaceae          | Poales         | 135,282 |
| NC005973              | <i>Oryza nivara</i>                                   | Poaceae          | Poales         | 134,494 |
| NC008155              | <i>Oryza sativa</i> (japonica group)                  | Poaceae          | Poales         | 134,496 |
| NC015826              | <i>Phyllostachys nigra</i> var. <i>henonis</i>        | Poaceae          | Poales         | 139,839 |
| NC002762              | <i>Triticum aestivum</i>                              | Poaceae          | Poales         | 134,545 |
| NC001666              | <i>Zea mays</i>                                       | Poaceae          | Poales         | 140,384 |
| NC013823              | <i>Typha latifolia</i>                                | Typaceae         | Poales         | 161,572 |
| NC005086              | <i>Amborella trichopoda</i>                           | Amborellaceae    | Amborellales   | 162,686 |
| NC006050              | <i>Nymphaea alba</i>                                  | Nymphaeaceae     | Nymphaeales    | 159,930 |
| NC009618              | <i>Cycas taitungensis</i>                             | Cycadaceae       | Cycadales      | 163,403 |
| NC004677              | <i>Pinus koraiensis</i>                               | Pinaceae         | Pinales        | 117,190 |
| NC010654              | <i>Welwitschia mirabilis</i>                          | Welwitschiaceae  | Welwitschiales | 119,726 |

annotated using DOGMA (Dual Organellar GenoMe Annotator, <http://dogma.cccb.utexas.edu/>, [34]). Annotation of the transfer RNA gene was performed using DOGMA and the tRNAscan-SE programme (ver. 1.23 [35]). Intron and exon boundaries for intron containing genes were determined by comparison of reference sequences of monocots.

### Taxon and gene sampling, sequence alignment and phylogenetic analysis

The 28 taxa selected here represent eight orders of monocots with two ancestral angiosperms and three gymnosperms as outgroups (Table 1). All of the plastid genome sequences were available in GenBank including the partial coding gene sequences of three species, *Pandanus utilis*, *Yucca schidigera*, and *Lilium superbum*. The character matrix for phylogenetic analysis consisted of the nucleotide sequences of 79 protein-coding genes and all of the pseudogenes were also included in the data matrix (Data File S1), although several gene and intron losses were found. We excluded four ribosomal RNA genes because they affected an obviously incongruent phylogenetic tree of monocots based on the data matrix of gene partitions [29]. They were aligned by MUSCLE [36] and manually adjusted. Both RAXML, BI, and MP analyses were performed on the concatenated 79-gene data set which generated by Geneious R6 (ver. 6.0.5 available from <http://www.geneious.com/> [37]). The length of the 79 aligned genes used for phylogenetic analysis was 96,692 bp and the aligned matrix is available from the authors on request. Akaike Information Criterion (AIC) via jModelTest (ver. 0.1.1 [38]) was used to determine the most appropriate substitution model for the full data matrix in addition to 79 separated gene data matrix (Table S1). The RAXML tree was generated with the RAXML BlackBox web-server (ver. 7.2.8 [39]) which performs under the GTR+G model of nucleotide substitution, with gamma distributed rate heterogeneity and a proportion of invariant sites. And also rapid bootstrap was performed with 100 replications. Bayesian inference analysis was performed using MrBayes plug-in [40] in Geneious 6.0.5 [37] with default setting upon the GTR model and gamma rate variations. The MP tree was also constructed by heuristic search and bootstrap was performed with 1000 replicates using PAUP\* 4.0b10 [41]. For the heuristic analyses, tree searches were performed with 1000 random sequence additions and tree-bisection-reconnection (TBR) branch swapping, permitting 10 trees to be held at each step to reduce time searching suboptimal 'islands' of trees (e.g. [26,42]). Bootstrap analysis [43] used the same settings as above.

### Comparative analyses of plastid genome sequences among the familial and species level in the order Liliales

We compared the plastid genome structures of three families from the order Liliales using the data of *Lilium longiflorum*, *Alstroemeria aurea*, and *Smilax china* [29]. The structural changes in the plastid genome were confirmed by gene content and order comparisons performed using MultiPip-maker [44]. IR boundaries were also described among three families and the substitution rates of 78 genes, which excluded *infA* gene because of their loss in *Smilax* and *Alstroemeria*, were calculated using DnaSP [45]. We also analysed the tandem repeat sequences distribution in the plastid genome of three families using Tandem Repeat Finder [46]. The sequence variation of 78 plastid genes between two *Lilium* species, *L. longiflorum* and *L. superbum*, were also confirmed.

## Results

### Plastid genome features of the Easter and Peruvian lily

We sequenced the complete plastid genome of the Easter lily (*Lilium longiflorum*, Liliaceae, KC968977) and the Peruvian lily (*Alstroemeria aurea*, Alstroemeriaceae, KC968976). Plastid genome of *L. longiflorum* is 152,793 bp in length and composed of LSC region of 82,230 bp, two IR copies of 26,520 bp and SSC region of 17,523 bp (Figure 1). A total of 136 predicted coding regions were detected, 92 of which were different and 22 of which were duplicated in the IR. The coding regions included 47 protein coding genes, 37 transfer RNAs, 4 duplicated ribosomal RNAs, and 26 ribosomal proteins (Table 2). Sixteen genes containing introns are *trnA*-UGC, *trnI*-GAU, *trnK*-UUU, *trnL*-UAA, *petB*, *petD*, *atpF*, *ndhA*, *ndhB*, *clpP*, *rpl2*, *rpl16*, *rps12*, *rps16*, *ycf1* and *ycf3*. Both *clpP* and *ycf3* were composed of two introns but the others had a single intron. Three genes, *psbT*, *rpl2* and *ndhD*, possess ACG and *rps19* has GUG as start codons. *infA* may be a pseudogene consisting of 231 bp modified at the 5' end.

*A. aurea* possess a structurally similar plastid genome to *L. longiflorum* and it is consisted of 155,510 bp. It includes LSC region of 84,241 bp, two IRs of 26,701 bp and SSC region of 17,867 bp (Figure 1). It shows the same gene contents and orders excluding the loss of *infA* and *ycf15*.

### Phylogenetic analyses

Tree topologies for RAxML (-lnL of 564070.1945), Bayesian inference analysis (BI), and the most parsimony analysis (MP) were congruent with each other and all clades were strongly supported in those trees (Figure 2). Monocots were monophyletic with strong support (BP 100 in both the RAxML and MP tree, PP 1.0 in the BI tree) and *Acorus* (order Acorales) was positioned in the basal clade within the monocots. *Lemna* (order Alismatales) was subsequently divergent. *Dioscorea* (order Dioscoreales) and *Pandanus* (order Pandanales) were sister to each other and made a strongly supported clade. A sister relationship between order Liliales and order Asparagales - commelinids clade was also improved (BP 98 in RAxML, PP 100 in BI, and BP 92 in MP). Within Liliales, a closer relationship between Liliaceae and Smilacaceae was formed, rather than Alstroemeriaceae. *Phoenix* (Arecales) was a sister of the Poales clade and *Typha* (Typhaceae) was located in the basal position in Poales. We constructed a phylogenetic tree according to their substitution model, by a combined data matrix of genes with GTR-model (GTR+G, GTR+I, GTR+I+G, total of them), TVM-model (TVM+G, TVM+I+G, total of them), and K81uf-model (K81uf+G and total of them) generated the RAxML tree, which has the same topology with overall data matrix combined of 79 genes even with the supporting values of branches often decreased (data not shown).

Major gene and intron deletions were found in several orders and are mapped on Figure 2: *accD* in Acorales, *rps16* in Dioscoreales, three genes (*accD*, *ycf1* and *ycf2*) and two introns (*rpoC1* and *clpP*) in Poaceae and *ndhF* and *ndhA* in Orchidaceae of Asparagales (*Oncidium* has a partial *ndhA* gene). In addition, *ndhK*, *ndhH*, both of *rps14* and *ycf4*, *psaJ*

and *rpl33* were lost in *Oncidium*, *Phalaenopsis*, *Festuca*, *O. sativa* and *Triticum*. *infA* was absent in *Lemna* (Alismatales) and Liliales, although *Lilium* has pseudo-*infA*.

### Comparison of the plastid genome sequences of three families of the order Liliales

Results of whole-genome comparison of three families, Liliaceae, Smilacaceae, and Alstroemeriaceae, revealed similar plastid genome structures and the gene contents were highly conserved within order Liliales (data not shown) except *infA*, which was deleted in *Smilax* and *Alstroemeria*. They also showed similar identities of 87–88% when compared to the plastid genome sequence of *Phalaenopsis* (Asparagales). Plastid genome of *Smilax* was longer than the other two genomes and it arises from the slightly larger LSC, IRs, and SSC and in their similar G+C contents (Table 3). IR junctions were varied among three families, despite the same expansion pattern in *Lilium* and *Alstroemeria* (Figure 3). Junction of LSC-IRb (JLB in Figure 3) was confirmed at *rps19* in *Lilium* and *Alstroemeria*, while it was at *rpl22* in *Smilax*. IRb-SSC boundary (JSB in Figure 3) was extended to *ndhF* gene only in *Alstroemeria* and 1bp of it was included in *Lilium*. IRa boundaries were positioned near to 3' end of *ycf1* (JSA in Figure 3) and with an end point of partial *rps19* in *Lilium* and *Alstroemeria*, and complete *rps19* with partial *rpl22* in *Smilax*, although these were not annotated in their original submission (JLA in Figure 3).

Both substitution per synonymous sites (Ks), non-synonymous sites (Ka) and their ratio (Ka/Ks) were calculated in 78 genes of three families as well as sequence variations (Table S2). Ks was highest at *psaJ* in comparison of *Lilium* vs *Smilax* (0.4751), and at *rpl36* in *Lilium* vs *Alstroemeria* and *Smilax* vs *Alstroemeria* (0.5319 and 0.5445). Ka was highest at *psaJ* in comparison of *Lilium* vs *Smilax* and *Smilax* vs *Alstroemeria* (0.1478 and 0.1751), and at *matK* in *Lilium* vs *Alstroemeria* (0.1539). However, Ka/Ks ratio was highest at *matK* in comparison of *Lilium* vs *Smilax* and *Smilax* vs *Alstroemeria* (0.6405 and 0.7439), and at *psaI* in *Lilium* vs *Alstroemeria* (0.7498). Average Ka/Ks ratio was 0.1938, 0.1744, and 0.1611 in comparison of *Lilium* vs *Smilax*, *Lilium* vs *Alstroemeria* and *Smilax* vs *Alstroemeria*, respectively. Each Ka/Ks ratio of 78 genes in three different combinations were compared in Figure 4 based on the group of genes. The most variable genes over 13% of variation were *psaJ* (20.74%), *ycf1* (18.13%), *rpl32* (17.82%), *rpl22* (17.42%), *matK* (16.7%), *ccsA* (15.87%), *psbK* (15.63%), *ndhF* (14.19%), *rps15* (13.92%), *rpoC2* (13.36%), and *rpl36* (13.16%). Out of them, the four genes *matK*, *ccsA*, *rpoC2*, and *ycf1* were longer than 1,000bp in total length (Table S2).

21 tandem repeat sequences were found (75bp in maximum within *ndhE*) over 20bp in *Smilax* plastid genome, 11 repeats (48bp in maximum within *petB* intron) in *Alstroemeria*, and 9 repeats (162bp in maximum between *rps12-clpP* IGS) in *Lilium* (data not shown). Most of the repeat sequences were found in the non-coding regions.

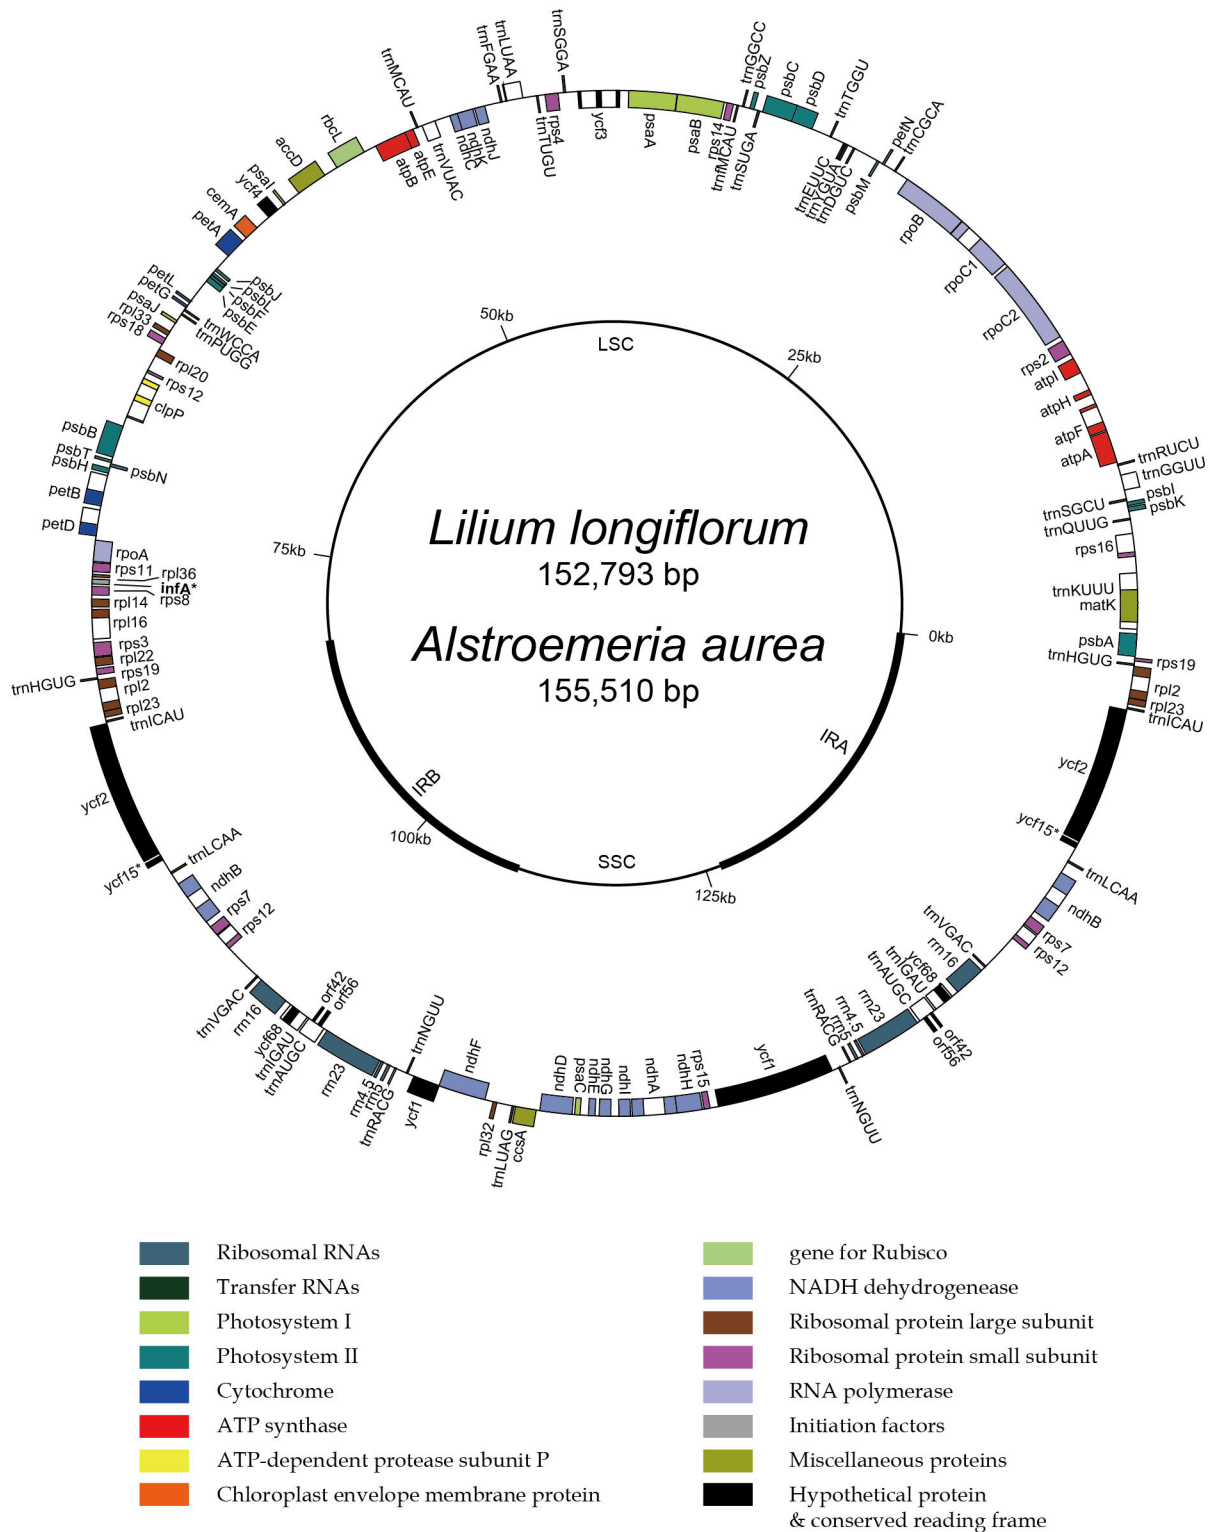

**Figure 1. Map of the complete plastid genome of *Lilium longiflorum* and *Alstroemeria aurea* represented as a circular molecule.**

doi: 10.1371/journal.pone.0068180.g001

**Table 2.** List of genes found in *Lilium longiflorum* chloroplast genome.

| Group of gene                                   | Name of gene*                         | No. |
|-------------------------------------------------|---------------------------------------|-----|
| RNA genes                                       | Ribosomal RNAs                        | 8   |
|                                                 | Transfer RNAs                         | 37  |
| Protein genes                                   | Photosynthesis                        |     |
|                                                 | Photosystem I                         | 5   |
|                                                 | Photosystem II                        | 15  |
|                                                 | Cytochrome                            | 6   |
|                                                 | ATP synthase                          | 6   |
|                                                 | Rubisco                               | 1   |
|                                                 | NADH dehydrogenase                    | 12  |
|                                                 | ATP-dependent protease subunit P      | 1   |
|                                                 | Chloroplast envelope membrane protein | 1   |
|                                                 | Ribosomal proteins                    |     |
|                                                 | large units                           | 11  |
|                                                 | small units                           | 15  |
| Transcription                                   | 4                                     |     |
| Translation                                     |                                       |     |
| Initiation factor                               | 1                                     |     |
| Miscellaneous proteins                          | 3                                     |     |
| Hypothetical proteins & Conserved reading frame | 10                                    |     |
| Total                                           | 136                                   |     |

(x2): duplicated genes, genes having introns

**Sequence variations between two *Lilium* species**

Inter-specific sequence variation was analyzed in 78 genes, excluding *cemA* which was absent in the database of *L. superbum* (Table S3). Our analysis included partial sequences for *L. superbum* because of its incomplete sequence

information. The variation ratio was calculated among truly aligned sequences between two species. We described sequence information of the ten most variable genes in Table 4 and it was highest in *rps15* with 3.66% variation. Most of them are comprised of less than 1,000bp except three genes *rpoA*, *matK*, and *ndhF*. In contrast, 11 genes were completely conserved, *petN*, *psal*, *psaJ*, *psbF*, *psbJ*, *psbL*, *psbT*, *psbZ*, *rpl23*, *rpl32*, and *rps7*. We found that some of the genes have indel sequences. 6bp insertion (TTGGCG) of repeat sequence was found in *L. longiflorum* compared with *L. superbum*. This similar pattern was also distributed in *infA* and another repeat sequence composed 6bp (CTTTTA) was deleted in *L. longiflorum*. 6bp insertion (CTTTAG) and 13bp deletion (ATATCTATTTTGATGATAGTGACA) were also detected in *rpl20* and *ycf2*, respectively. In *ndhG*, eight T of poly-T region was deleted (Table S3).

**Discussion**

Here, we analyzed the complete plastid genome sequences of two important ornamental lily species (*Lilium longiflorum* and *Alstroemeria aurea*) of the order Liliales and it allowed us to solve the confused sister relationship of this order. We also achieved a comparative analysis in inter-familial and inter-specific variation of true liliid plastid genomes.

**Sister relationship of the order Liliales in monocots**

Phylogenetic analyses of 79 plastid protein-coding genes produced a well-resolved phylogeny of seven monocot orders and it was mostly congruent with the results of Chase and colleagues [26]. The basal position of Acorales (*Acorus*) and the subsequent divergence of Alismatales (*Lemna*) were reconfirmed. These two basal orders are commonly aquatic or emergent aquatic [23]. Petrosaviales, which was recognised in APG III [25], was regarded as a sister of the liliid/commelinid clade [26,27], but unfortunately, it was not included in this study. In recent phylogenetic studies using plastid IR sequences, these relationships were also weakly supported as the Liliales and Asparagales+commelinids clade with BP 68 and Asparagales and commelinids clade with BP 53 [28]. Givnish and colleagues [27] introduced a well-defined relationship of monocots using a ML tree composed of branches with strong support based on 81 plastid genes. Although they focused on the phylogenetic relationship of Poales and a MP tree using the same data matrix, they showed a different topology with a closer relationship between Dioscoreales and Asparagales. The sister relationships among the Dioscoreales-Pandanales, Liliales, Asparagales, and commelinids clade, which showed the rapid divergence among the groups, were well supported. However, the contradiction between poor resolution and closely related group around Liliales still remained even though an attempt using various data matrix of chloroplast genes [29]. Our phylogenetic tree revealed a strong sister relationship of Liliales to the Asparagales+commelinids clade with improved resolution compared to the previous phylo-genomic study [29] using *Smilax* and *L. superbum* data as a representatives of Liliales. Additionally, in Poales, Typhaceae was located on the root of

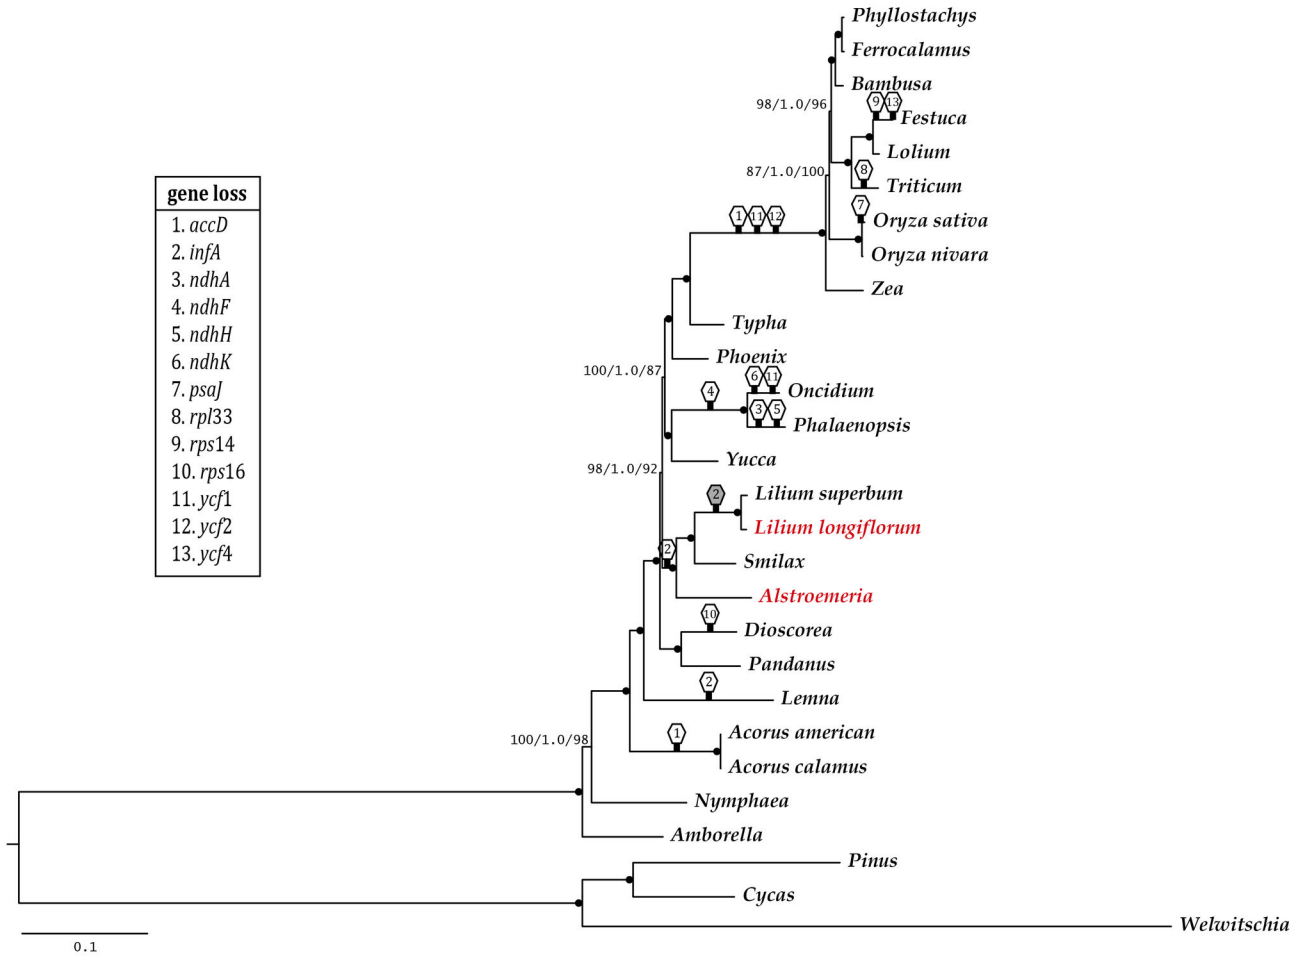

**Figure 2. RAxML tree monocot orders using 79 protein-coding genes.** Support values for ML, BI and MP are provided at the nodes. A branch with dotted end indicated a high supporting values BP100 in RAxML / PP1.0 in BI, and BP 100 in MP tree and gene loss (sexangle with number) were described on the branch.  
doi: 10.1371/journal.pone.0068180.g002

**Table 3.** Comparison of the plastid genome sequences of 3 families in Liliales.

| Species(Family)                                                              | <i>Lilium</i>                     |                                      |                                                 |
|------------------------------------------------------------------------------|-----------------------------------|--------------------------------------|-------------------------------------------------|
|                                                                              | <i>longiflorum</i><br>(Liliaceae) | <i>Smilax china</i><br>(Smilacaceae) | <i>Alstroemeria aurea</i><br>(Alstroemeriaceae) |
| Total length (bp)                                                            | 152,793                           | 157,878                              | 155,510                                         |
| LSC (bp)                                                                     | 82,230                            | 84,608                               | 84,241                                          |
| SSC (bp)                                                                     | 17,523                            | 18,536                               | 17,867                                          |
| IRs (bp)                                                                     | 26,520                            | 27,367                               | 26,701                                          |
| % of G+C                                                                     | 37.02                             | 37.26                                | 38.05                                           |
| % of A+T                                                                     | 62.98                             | 62.74                                | 61.95                                           |
| Conserved region compare to <i>Phalaenopsis</i> (Asparagales) plastid genome | 123,888bp (88.0%)                 | 124,907 (88.4%)                      | 127,738bp (87.5%)                               |

the order and Poaceae showed a well-resolved phylogenetic relationship as the subfamily Panicoideae [Ehrhartoideae (Bambusoideae+Pooideae)]. No conflict was observed compared to previous studies of Poales [11,13].

Gene loss events in major clade of monocots was congruent with the previous studies [22,29,47], except *infA* gene loss in Liliales, although it was present in *Lilium* as a pseudo-gene.

**Inter-familial variation of plastid genome structure in Liliales**

The gene contents and orders in the plastid genome were congruent among three families, except *infA* loss in *Smilax* and *Alstroemeria*. If unclear IR boundary information is given, incorrect gene order phylogenies are recovered. Therefore, the maintenance of the IR is necessary in the evolution of chloroplast genomes in most cases. Yue and colleagues [48] proposed that the IR provides an insulation mechanism that stabilizes the genome structure and the genes in single copy regions do not commute across the IR. Generally, IRs of

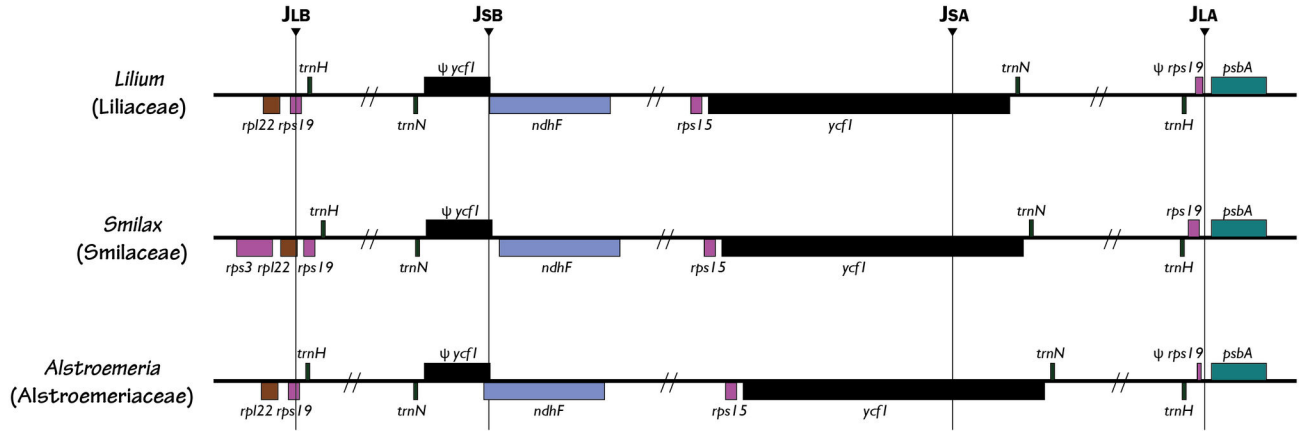

**Figure 3. Schemes describing the IR junction in three plastid genomes represent of the family Liliaceae, Smilacaceae, and Alstroemeriaceae of Liliales.** The colour of each gene was identical to Figure 1.

doi: 10.1371/journal.pone.0068180.g003

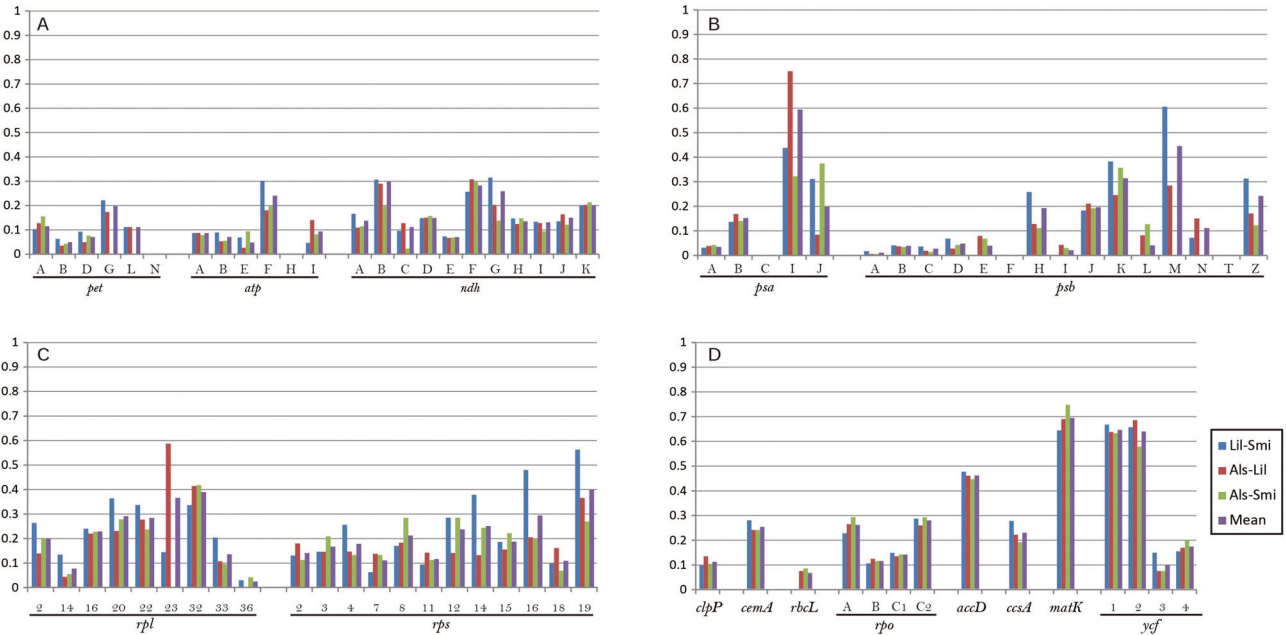

**Figure 4. Ka/Ks ratio of pair-wise comparison among the three families of Liliales according to the function of each gene.** A) genes encoding cytochrome, ATP synthase, and NADH hydrogenase, B) genes encoding Photosynthesis, C) genes encoding ribosomal protein, D) the other genes.

doi: 10.1371/journal.pone.0068180.g004

monocots contained a *trnH-rps19* gene cluster near the IRa-LSC junction; moreover, they expand more progressively than non-monocot angiosperms [49]. They explained that a double-strand break (DSB) event first occurred at IRb and led to the expansion of the IR to *trnH*, followed by a successive DSB event within IRa leading to the expansion of the IR to *rps19* or to *rp122*. Results comparing IR expansion among three families of Liliales showed that they have a typical JLA of monocots with a *trnH-rps19* cluster. However, JLB was extended to *rp122*

in *Smilax* plastid genome. Moreover, we found that JSB was moved to *ndhF* gene in *Alstroemeria* plastid genome (Figure 3) which explains the length variation in the total sequences of three different plastid genomes, as well as a length variation in inter-genic spacer region (Table 3). Ka/Ks ratios according to the pair-wise comparison of substitution among three families were different to the gene partition using whole data of major monocots lineages of Liu et al. [29]. From the results, we suggest that *ccsA*, *matK*, *ndh* gene series (A, B, D, F, and H),



**Table 4.** Most variable 10 genes in comparison of *Lilium longiflorum* vs *Lilium superbum*.

| gene name    | total length | no. of variable sites | % of variable site | indel (type)        |
|--------------|--------------|-----------------------|--------------------|---------------------|
| <i>rps15</i> | 273          | 10                    | 3.66               |                     |
| <i>petG</i>  | 114          | 4                     | 3.51               |                     |
| <i>rp136</i> | 114          | 3                     | 2.63               |                     |
| <i>infA</i>  | 231          | 5                     | 2.16               | CTTTTA (del/repeat) |
| <i>rps3</i>  | 657          | 12                    | 1.83               |                     |
| <i>rps14</i> | 303          | 5                     | 1.65               |                     |
| <i>rpoA</i>  | 1008         | 16                    | 1.59               |                     |
| <i>matK</i>  | 1539         | 24                    | 1.56               |                     |
| <i>ndhF</i>  | 2223         | 32                    | 1.44               |                     |
| <i>rps19</i> | 279          | 4                     | 1.43               |                     |

*rpoA*, and *rbcl* will be suitable genes for phylogenetic study of monocots concerning available length using PCR amplification reaction and proportion of variable sites, though *ndh* genes were often missing especially in some lineage of Asparagales. Most of repeat sequences were distributed in the non-coding regions of inter-genic spacer or intron. Although, many of the repeat sequences were in *Smilax*, and the largest repeat, over 100bp, was uniquely found in *Lilium*.

#### **infA divergence among three families**

Millen and colleagues [50] suggested that *infA*, which codes for translation initiation factor 1, has been entirely lost or has become a pseudogene ca 24 separate times in 309 angiosperms. In four species, this gene was regarded to be transferred from chloroplast to nuclear DNA independently during angiosperm evolution. According to their results, this parallel event occurred in *Tricyrtis* and *Smilax*, a member of Liliales. Our data revealed that this event also occurred in *Alstroemeria*, which is closer to the basal Liliales than *Lilium* or *Smilax*. Interestingly, even in the *Lilium* plastid genome, *infA* seems to have lost its function because it has AAT instead of AGT in the start codon position and includes two premature stop codons, although we do not know what kind of mutation has occurred in the start position of *infA*. Further study is needed to improve our understanding of *infA* gene evolution in Liliales.

#### **Inter-specific variation between two *Lilium* species**

Results of the complete plastid genome sequence of two lilies in this study make it possible to analyse the details of sequence variation in species level although it was restricted just in the coding region. We compared the variation of 78 plastid genes between *L. longiflorum* and *L. superbum*, which has been used as a representative of the order Liliales until this time. 11 genes of 78 genes were conserved between two species, 19 genes were variable over 1% in the entire aligned sequence, and 5 indels, including two repeat sequences composed of 6bp, were also found. The result will provide an informative guide line for recognizing the species and genus of

the order Liliales in the near future when more sequence data is accumulated.

Although there was a limitation of material amount, we describe here a simple method for extracting plastid DNA with a simple buffer composition, in the hope that it will be applied in monocot plastome research, which has already been applied in some of the Asparagales members, for example, Asparagaceae, Alliaceae, and Orchidaceae.

## **Supporting Information**

**Figure S1. Electrophoretogram of isolated plastid DNA in the present study.** M) lambda-HindIII digest, Lili) *Lilium longiflorum* (268 ng/μl), Als) *Alstroemeria aurea* (314 ng/μl). (TIF)

**Table S1. Substitution models for each gene used in the phylogenetic study.** (DOCX)

**Table S2. Substitution rates and sequence variations among 3 families of Liliales.** (DOCX)

**Table S3. Comparison of the sequence variation between two *Lilium* species.** (DOCX)

**Data File S1. Aligned matrix of combined 79 genes for the present study.** (DOCX)

## **Acknowledgements**

Authors thank Prof. Cheng-Xin Fu of Zhejiang University for providing the data of plastid genome sequence of *Smilax china* generated by them and Prof. Sung-Soo Jun of Cachon University for his advice adjusting the CIB buffer composition. The English in this document has been checked by at least two professional editors, both native speakers of English. For a certificate, please see: <http://www.textcheck.com/certificate/lz7yam>.

## **Author Contributions**

Conceived and designed the experiments: JSK JHK. Performed the experiments: JSK. Analyzed the data: JSK. Contributed reagents/materials/analysis tools: JSK JHK. Wrote the manuscript: JSK.

## References

- Rivas JDL, Lozano JJ, Ortiz AR (2002) Comparative analysis of chloroplast genomes: functional annotation, genome-based phylogeny, and deduced evolutionary patterns. *Genome Res* 12: 567-583. doi:10.1101/gr.209402. PubMed: 11932241.
- Haberle RC, Fourcade HM, Boore JL, Jansen RK (2008) Extensive rearrangements in the chloroplast genome of *Trachelium caeruleum* are associated with repeats and tRNA genes. *J Mol Evol* 66: 350-361. doi:10.1007/s00239-008-9086-4. PubMed: 18330485.
- Egan AN, Schlueter J, Spooner DM (2012) Applications of next-generation sequencing in plant biology. *Am J Bot* 99: 175-185. doi:10.3732/ajb.1200020. PubMed: 22312116.
- Maier RM, Neckermann K, Igloi GL, Kössel H (1995) Complete sequence of the maize chloroplast genome: gene content, hotspots of divergence and fine tuning of genetic information by transcript editing. *J Mol Biol* 251: 614-628. doi:10.1006/jmbi.1995.0460. PubMed: 7666415.
- Ogihara Y, Isono K, Kojima T, Endo A, Hanaoka M et al. (2000) Chinese spring wheat (*Triticum aestivum* L.) chloroplast genome: complete sequence and contig clones. *Plant Mol Biol Rep* 18: 243-253. doi:10.1007/BF02823995.
- Ogihara Y, Isono K, Kojima T, Endo A, Hanaoka M et al. (2002) Structural features of a wheat plastome as revealed by complete sequencing of chloroplast DNA. *Mol Genet Genomics* 266: 740-746. doi:10.1007/s00438-001-0606-9. PubMed: 11810247.
- Masood MS, Nishikawa T, Fukuoka S, Njenga PK, Tsudzuki T et al. (2004) The complete nucleotide sequence of wild rice (*Oryza nivara*) chloroplast genome: first genome wide comparative sequence analysis of wild and cultivated rice. *Gene* 340: 133-139. doi:10.1016/j.gene.2004.06.008. PubMed: 15556301.
- Asano T, Tsudzuki T, Takahashi S, Shimada H (2004) Complete nucleotide sequence of the sugarcane (*Saccharum officinarum*) chloroplast genome: a comparative analysis of four monocot chloroplast genomes. *DNA Res* 11: 93-99. doi:10.1093/dnares/11.2.93. PubMed: 15449542.
- Saski C, Lee S-B, Fjellheim S, Guda C, Jansen RK et al. (2007) Complete chloroplast genome sequences of *Hordeum vulgare*, *Sorghum bicolor* and *Agrostis stolonifera*, and comparative analyses with other grass genomes. *Theor Appl Genet* 115: 571-590. doi:10.1007/s00122-007-0567-4. PubMed: 17534593.
- Diekmann K, Hodkinson TR, Wolfe KH, van den Bekerom R, Dix PJ et al. (2009) Complete chloroplast genome sequence of major allogamous forage species, perennial ryegrass (*Lolium perenne* L.). *DNA Res* 16: 165-176. doi:10.1093/dnares/dsp008. PubMed: 19414502.
- Guisinger MM, Chumley TW, Kuehl JV, Boore JL, Jansen RK (2010) Implications of the plastid genome sequence of *Typha* (Typhaceae, Poales) for understanding genome evolution in Poaceae. *J Mol Evol* 70: 149-166. doi:10.1007/s00239-009-9317-3. PubMed: 20091301.
- Givnish TJ, Ames M, McNeal JR, McKain MR, Steele PR et al. (2010) Assembling the tree of the monocotyledons: plastome sequence phylogeny and evolution of Poales. *Ann Mo Bot Gard* 97: 584-616. doi:10.3417/2010023.
- Zhang Y-J, Ma P-F, Li D-Z (2011) High-throughput sequencing of six bamboo chloroplast genomes: phylogenetic implications for temperate woody bamboos (Poaceae: Bambusoideae). *PLOS ONE* 6: e20596. doi:10.1371/journal.pone.0020596. PubMed: 21655229.
- Steele PR, Hertweck KL, Mayfield D, McKain MR, Leebens-Mack J et al. (2012) Quality and quantity of data recovered from massively parallel sequences: examples in Asparagales and Poaceae. *Am J Bot* 99: 330-348. doi:10.3732/ajb.1200032. PubMed: 22291168.
- Hiratsuka J, Shimada H, Whittier R, Ishibashi T, Sakamoto M et al. (1989) The complete sequence of the rice (*Oryza sativa*) chloroplast genome: intermolecular recombination between distinct tRNA genes accounts for a major plastid inversion during the evolution of the cereals. *Mol Gen Genet* 217: 185-194. doi:10.1007/BF02464880. PubMed: 2770692.
- Goremykin VV, Holland B, Hirsch-Ernst KI, Hellwig FH (2005) Analysis of *Acorus calamus* chloroplast genome and its phylogenetic implications. *Mol Biol Evol* 22: 1813-1822. doi:10.1093/molbev/msi173. PubMed: 15930156.
- Chang C-C, Lin H-C, Lin I-P, Chow T-Y, Chen H-H et al. (2006) The chloroplast genome of *Phalaenopsis aphrodite* (Orchidaceae): analysis of evolutionary rate with that of grasses and its phylogenetic implications. *Mol Biol Evol* 23: 279-291. PubMed: 16207935.
- Hansen DR, Dastidar SG, Cai Z, Penafior C, Kuehl JV et al. (2007) Phylogenetic and evolutionary implications of complete chloroplast genome sequences of four early-diverging angiosperms: *Buxus* (Buxaceae), *Chloranthus* (Chloranthaceae), *Dioscorea* (Dioscoreaceae), and *Illicium* (Schisandraceae). *Mol Phylogenet Evol* 45: 547-563. doi:10.1016/j.ympev.2007.06.004. PubMed: 17644003.
- Mardanov AV, Ravin NV, Kuznetsov BB, Samigullin TH, Antonov AS et al. (2008) Complete sequence of the duckweed (*Lemna minor*) chloroplast genome: structural organization and phylogenetic relationships to other angiosperms. *J Mol Evol* 66: 555-564. doi:10.1007/s00239-008-9091-7. PubMed: 18463914.
- Wu F-H, Chan M-T, Liao D-C, Hsu C-T, Lee Y-W et al. (2010) Complete chloroplast genome of *Oncidium* Gower Ramsey and evaluation of molecular markers for identification and breeding in Oncidiinae. *BMC Plant Biol* 10: 68. doi:10.1186/1471-2229-10-68. PubMed: 20398375.
- Yang M, Zhang X, Liu G, Yin Y, Chen K et al. (2010) The complete chloroplast genome sequence of date palm (*Phoenix dactylifera* L.). *PLOS ONE* 5: e12762. doi:10.1371/journal.pone.0012762. PubMed: 20856810.
- Jansen RK, Cai Z, Raubeson LA, Daniell H, dePamphilis CW et al. (2007) Analysis of 81 genes from 64 plastid genomes resolves relationships in angiosperms and identifies genome-scale evolutionary patterns. *Proc Natl Acad Sci U S A* 104: 19369-19374. doi:10.1073/pnas.0709121104. PubMed: 18048330.
- Chase MW (2004) Monocot relationships: an overview. *Am J Bot* 91: 1645-1655. doi:10.3732/ajb.91.10.1645. PubMed: 21652314.
- APG (Angiosperm Phylogeny Group) II (2003) An update of the Angiosperm Phylogeny Group classification for the orders and families of flowering plants. *Bot J Linn Soc* 141:399-436
- APG (Angiosperm Phylogeny Group) III (2009) An update of the Angiosperm Phylogeny Group classification for the orders and families of flowering plants: APG Bot III. *J Linn Soc* 161:105-121
- Chase MW, Fay MF, Devey DS, Maurin O, Rønsted N et al. (2006) Multigene analyses of monocot relationships: A summary. In: T ColumbusEA FriarJM PorterLM PrinceMG Simpson. *Monocots: comparative biology and evolution*. Claremont: Rancho Santa Ana Botanic Garden. pp. 63-75.
- Givnish TJ, Pires JC, Graham SW, McPherson MA, Prince LM et al. (2006) Phylogenetic relationships of monocots based on the highly informative plastid gene *ndhF*: evidence for widespread concerted convergence. *Aliso* 22: 28-51.
- Moore MJ, Hassan N, Gitzendanner MA, Bruenn RA, Croley M et al. (2011) Phylogenetic analysis of the plastid inverted repeat for 244 species: insights into deeper-level angiosperm relationships from a long, slowly evolving sequence region. *Int J Plant Sci* 172: 541-558. doi:10.1086/658923.
- Liu J, Di Z-C, Zhao Y-P, Fu C-X, Xiang Q-Y (2012) Complete coDNA genome sequence of *Smilax china* and phylogenetic placement of Liliales-Influences of gene partitions and taxon sampling. *Mol Phylogenet Evol* 64: 545-562. doi:10.1016/j.ympev.2012.05.010. PubMed: 22643288.
- Kim JS, Hong J-K, Chase MW, Fay MF, Kim J-H (2013) Familial relationships of the monocot order Liliales based on a molecular phylogenetic analysis using four plastid loci, *matK* rbcL, *atpB* and *atpF-H*. *Bot J Linn Soc* 172: 5-21.
- Jansen RK, Raubeson LA, Boore JL, dePamphilis CW, Chumley TW et al. (2005) Methods for obtaining and analyzing whole chloroplast genome sequences. *Methods Enzymol* 395: 348-384. doi:10.1016/S0076-6879(05)95020-9. PubMed: 15865976.
- Diekmann K, Hodkinson TR, Fricke E, Barth S (2008) An Optimized Chloroplast DNA Extraction Protocol for Grasses (Poaceae) Proves Suitable for Whole Plastid Genome Sequencing and SNP Detection. *PLOS ONE* 3: e2813. doi:10.1371/journal.pone.0002813. PubMed: 18665252.
- Seigneurin-Berny D, Salvi D, Joyard J, Rolland N (2008) Purification of intact chloroplasts from *Arabidopsis* and spinach leaves by isopycnic centrifugation. *C Prot* 3. Cell Biol Unit. p. 30.
- Wyman SK, Jansen RK, Boore JL (2004) Automatic annotation of organellar genomes with DOGMA. *Bioinformatics* 20: 3252-3255. doi:10.1093/bioinformatics/bth352. PubMed: 15180927.
- Schattner P, Brooks AN, Lowe TM (2005) The tRNAscan-SE, snoscan and snoGPS Web servers for the detection of tRNAs and snoRNAs. *Nucleic Acids Res* 33: W686-W689. doi:10.1093/nar/gki366. PubMed: 15980563.
- Edgar RC (2004) MUSCLE: a multiple sequence alignment method with reduced time and space complexity. *BMC Bioinformatics* 5: 1-19. doi:10.1186/1471-2105-5-1. PubMed: 14706121.
- Drummond AJ, Ashton B, Buxton S, Cheung M, Cooper A et al. (2010). *Geneious* Version 5: 1 Available: <http://www.geneious.com>.

38. Posada D (2008) jModelTest: Phylogenetic model averaging. *Mol Biol Evol* 25: 1253-1256. doi:10.1093/molbev/msn083. PubMed: 18397919.
39. Stamatakis A, Hoover P, Rougemont J (2008) A rapid bootstrap algorithm for the RAxML web-servers. *Syst Biol* 75: 758-771.
40. Ronquist F, Huelsenbeck JP (2003) MRBAYES 3: Bayesian phylogenetic inference under mixed models. *Bioinformatics* 19: 1572-1574. doi:10.1093/bioinformatics/btg180. PubMed: 12912839.
41. Swofford DL (2002) PAUP\*: Phylogenetic analysis using parsimony (\* and other methods). MA: Sinauer Associates, Sunderland
42. Kim D-K, Kim JS, Kim J-H (2012) The phylogenetic relationships of Asparagales in Korea based on five plastid DNA regions. *J Plant Biol* 55: 325-345. doi:10.1007/s12374-011-0016-4.
43. Felsenstein J (1985) Confidence limits on phylogenies: An approach using the bootstrap. *Evolution* 39: 783-791. doi:10.2307/2408678.
44. Schwartz S, Zhang Z, Frazer KA, Smit A, Riemer C et al. (2000) PipMaker-A Web server for aligning two genomic DNA sequences. *Genome Res* 10: 577-586. doi:10.1101/gr.10.4.577. PubMed: 10779500.
45. Librado P, Rozas J (2009) DnaSP v5: A software for comprehensive analysis of DNA polymorphism data. *Bioinformatics* 25: 1451-1452. doi:10.1093/bioinformatics/btp187. PubMed: 19346325.
46. Benson G (1999) Tandem repeats finder: a program to analyze DNA sequences. *Nucleic Acids Res* 27: 573-580. doi:10.1093/nar/27.2.573. PubMed: 9862982.
47. Huotari T, Korpelainen H (2012) Complete chloroplast genome sequence of *Elodea canadensis* and comparative analyses with other monocot plastid genomes. *Gene*, 508: 96-105. doi:10.1016/j.gene.2012.07.020. PubMed: 22841789. PubMed: 22841789
48. Yue F, Cui L, dePamphilis CW, Moret BME, Tang J (2008) Gene rearrangement analysis and ancestral order inference from chloroplast genomes with inverted repeat. *BMC Genomics* 9: S25. doi:10.1186/1471-2164-9-25. PubMed: 18366615.
49. Wang R-J, Cheng C-L, Chang C-C, Wu C-L, Su T-M et al. (2008) Dynamics and evolution of the inverted repeat-large single copy junctions in the chloroplast genomes of monocots. *BMC Evol Biol* 8: 36. doi:10.1186/1471-2148-8-36. PubMed: 18237435.
50. Millen RS, Olmstead RG, Adams KL, Palmer JD, Lao NT et al. (2001) Many parallel losses of *infA* from chloroplast DNA during angiosperm evolution with multiple independent transfers to the nucleus. *Plant Cell* 13: 645-658. doi:10.1105/tpc.13.3.645. PubMed: 11251102.
